# Supplementary material for: The dopaminergic neuroprotective effects of different phytosterols identified in rice bran and rice bran oil
Source: Royal Society of Chemistry journal article supplement (doi:10.1039/d1fo01509e), 2021-01-01
Supplement: d1fo01509e1.pdf [file d1fo01509e1.pdf]

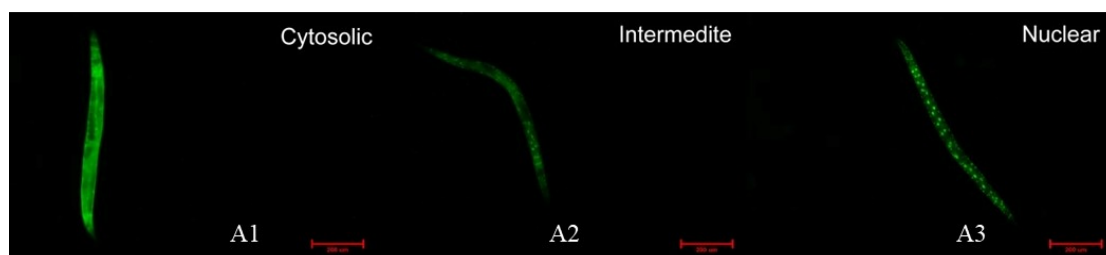

**Supplemental Fig. 1**

Three categories were used to describe the cellular distribution of DAF-16/FOXO:

(A1) cytosolic, (A2) intermediate, and (A3) nuclear (scale bar = 200 $\mu$ m).

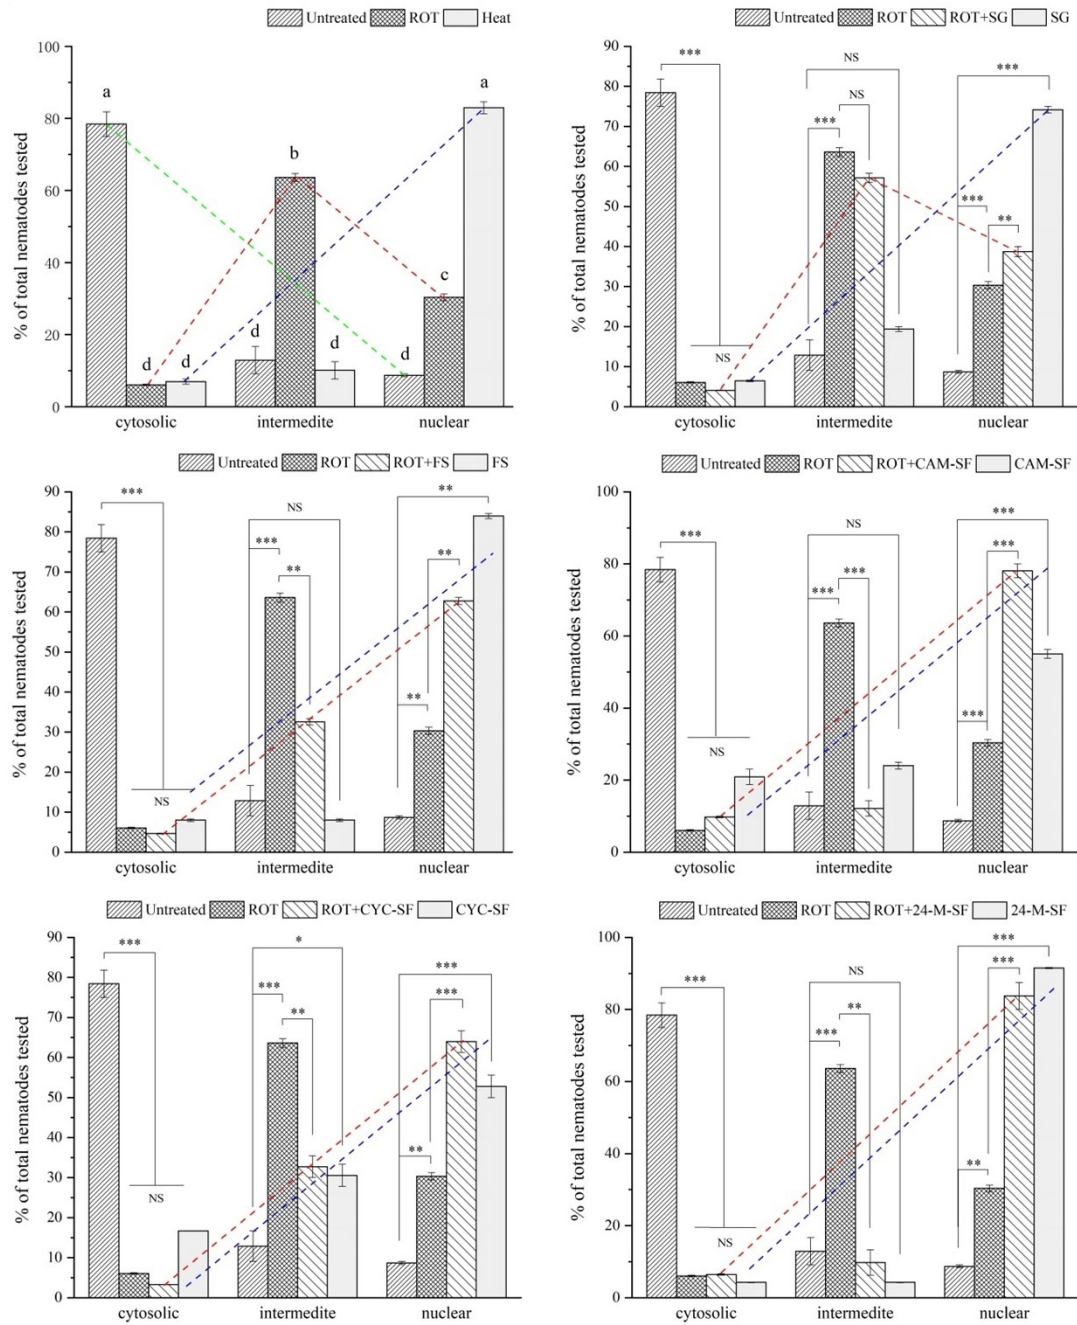

**Supplemental Fig. 2**

The green dotted line depicted the composition of the cellular distribution of DAF-16/FOXO in untreated group, and the red and blue dotted line depicted the composition of the cellular distribution of DAF-16/FOXO in ROT-treated (ROT + phytosterol) and heat-treated (phytosterols-treated) group, respectively.

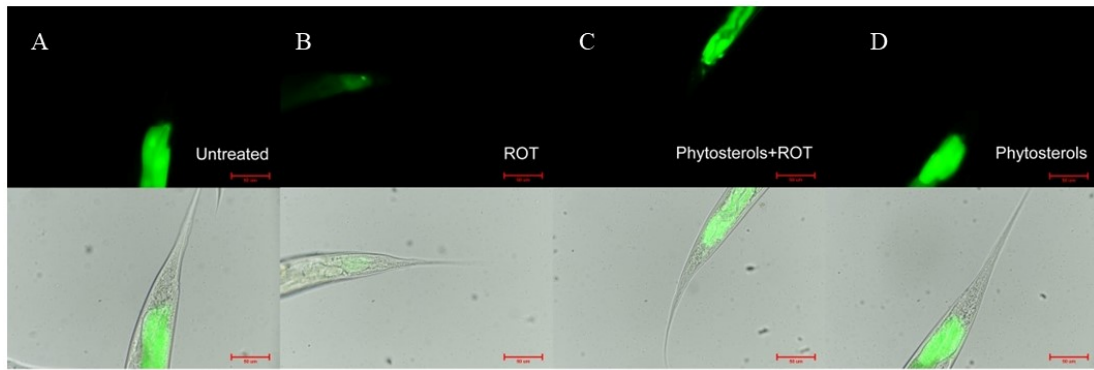

### Supplemental Fig. 3

The image of the expression of SOD-3 in (A) untreated group, (B) ROT-treated group, (C) ROT + phytosterols treated group, (D) phytosterols-treated group (scale bar = 50 $\mu$ m)

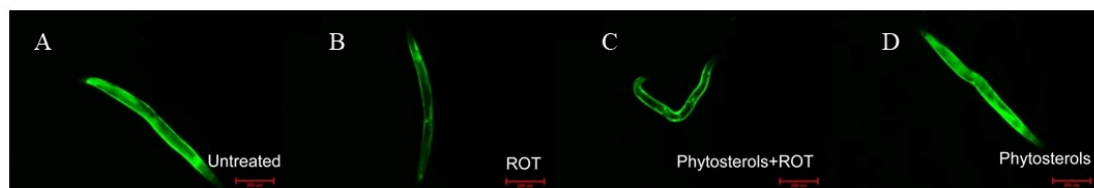

### Supplemental Fig. 4

The image of the expression of GST-4 in (A) untreated group, (B) ROT-treated group, (C) ROT + phytosterols treated group, (D) phytosterols-treated group (scale bar = 100 $\mu$ m)
